1  
2  
3  
4  
5  
6  
7  
8  
9  
10  
11  
12  
13  
14  
15  
16  
17  
18

**Title:**

*Shifting effects of host physiological condition following pathogen establishment*

**Authors:**

Kate E. Langwig, A. Marm Kilpatrick, Macy J. Kailing, Nichole Laggan, J. Paul White, Heather M. Kaarakka, Jennifer A. Redell, John E. DePue, Katy L. Parise, Jeffrey T. Foster, and Joseph R. Hoyt

- 1 Department of Biological Sciences, Virginia Polytechnic Institute, Blacksburg, VA, USA
- 2 Department of Ecology and Evolutionary Biology, University of California, Santa Cruz, CA, USA
- 3 Wisconsin Department of Natural Resources, Madison, WI, USA
- 4 Pathogen and Microbiome Institute, Northern Arizona University, Flagstaff, AZ, USA
- 5 Michigan Department of Natural Resources, Baraga, MI, USA

19 **Abstract:**

20

21 Understanding host persistence with emerging pathogens is essential for conserving populations.  
22 Hosts may initially survive pathogen invasions through pre-adaptive mechanisms. However,  
23 whether pre-adaptive traits are directionally selected to increase in frequency depends on the  
24 heritability and environmental dependence of the trait and the costs of trait maintenance. Body  
25 condition is likely an important pre-adaptive mechanism aiding in host survival, although can be  
26 seasonally variable in wildlife hosts. We used data collected over seven years on bat body mass,  
27 infection, and survival to determine the role of host body condition during the invasion and  
28 establishment of the emerging disease, white-nose syndrome. We found that when the pathogen  
29 first invaded, bats with higher body mass were more likely to survive, but this effect dissipated  
30 following the initial epizootic. We also found that heavier bats lost more weight overwinter, but  
31 fat budgeting depended on infection severity. Lastly, we found little support that bat mass  
32 increased in the population after pathogen arrival, and there was high annual plasticity in  
33 individual bat masses. Overall, our results suggest that factors that contribute to host survival  
34 during pathogen invasion may diminish over time, and are potentially replaced by other host  
35 adaptations.

36

37 **Keywords:** body mass, emerging infectious disease, wildlife disease, population impacts, white-  
38 nose syndrome, *Pseudogymnoascus destructans*, disease ecology, host physiology, body  
39 condition

40 **Introduction:**

41

42 The introduction of novel pathogens to naive hosts can have profound effects on  
43 populations [1-7]. Hosts may survive initial pathogen invasion through multiple mechanisms  
44 including evading infection or pre-adaptive traits that allow for survival despite infection or  
45 disease [8, 9]. Importantly, factors enabling hosts to survive during initial invasion may not  
46 confer any advantage subsequently, particularly if pre-adaptive traits have strong tradeoffs, or are  
47 highly plastic (e.g. environmentally dependent) [10, 11]. Ultimately, traits that determine long-  
48 term host-pathogen coexistence may take longer to evolve and become widespread than traits  
49 allowing for initial survival, particularly if such traits provide stronger protection than pre-  
50 adaptive mechanisms [10, 12-14].

51 Factors that affect the probability of host survival with invasive pathogens include age,  
52 chronic disease, prior exposure, and body mass [15]. In general, hosts with adequate fat stores,  
53 high nutrient levels, and access to high quality habitat should demonstrate improved disease  
54 outcomes over weaker hosts. However, host body condition can be highly variable across  
55 seasons and years, even within individuals, leading to heterogeneity in the relationship between  
56 host body condition and disease, and making it a less reliable mechanism long-term [16].  
57 Variable effects of body condition may be particularly pronounced when there is highly seasonal  
58 availability of food sources, leading to high stochasticity among individuals in their ability to  
59 consistently maintain high body condition when faced with annual disease outbreaks.

60 White-nose syndrome (WNS) is a seasonal annual epizootic of bats caused by the fungal  
61 pathogen *Pseudogymnoascus destructans* [17-20]. White-nose syndrome was first detected New  
62 York, USA in 2006, and has caused widespread declines in hibernating bat populations across  
63 North America [6, 21, 22]. *Pseudogymnoascus destructans* grows optimally in cool conditions  
64 (1–17 °C) [23], resulting in annual winter epidemics that occur when bats begin hibernating [18].  
65 Invasion of *P. destructans* into bat skin tissue causes severe physiological disruption, elevating  
66 bat metabolic rate and increasing respiratory acidosis [24, 25]. Bats, in turn, arouse to normalize  
67 blood pH which further increases evaporative water loss and causes dehydration. Higher energy  
68 expenditure from infection, increases fat loss, and emaciation, which frequently leads to  
69 mortality [26-28].

70           Increases in stored fat and improved budgeting of fat overwinter are therefore  
71 hypothesized to be important mechanisms determining bat survival with WNS [29-31], which  
72 typically increases within 4-5 years of WNS arrival after initially severe declines [6, 17, 32, 33].  
73 However, other mechanisms of host persistence have also been described, including potential  
74 increases in host resistance through immunity or microbially-mediated reductions in pathogen  
75 growth [17, 33], and movement toward colder roosting conditions which limits fungal growth  
76 [34, 35]. Nonetheless, changes in body mass have the potential to have strong effects on bat  
77 survival, but comprehensive analyses on the effect of body mass on individual bat survival with  
78 WNS in the field have yet to be conducted. In addition, because host body condition may exhibit  
79 high annual variability [36], the importance of body mass as a sustained factor affecting  
80 population persistence with WNS merits additional investigation. Here, we investigate changes  
81 in the effect of body mass on survival of individual little brown bats (*Myotis lucifugus*) during  
82 the invasion and establishment of *P. destructans* across 24 sites. We hypothesized that while  
83 fatter bats might initially exhibit higher survival, the positive effects of higher body condition  
84 could diminish over time as host disease resistance increases in bat populations.

85

## 86 **Methods:**

87           We studied the arrival and establishment of *P. destructans* at 24 hibernacula (caves and  
88 mines where bats spend the winter) in Virginia, Wisconsin, Illinois, and Michigan over seven  
89 years (Tables S1-S3). We visited sites twice per winter and collected data on infection status and  
90 body mass of bats. At each site, we sampled up to 25 individual bats stratified across site  
91 sections. Because sites used in this study were primarily small mines where it was possible to  
92 observe all bats present, in many instances, all individuals in the population were sampled. For  
93 each bat, we collected a standardized epidermal swab sample [18], attached a unique aluminum  
94 band, and measured body mass using a digital scale (GDealer, accuracy +/- 0.03 grams). Because  
95 common condition indices are no more effective than body mass for estimating fat stores [37],  
96 we did not include information on bat forearm size in order to reduce handling disturbance. At  
97 every visit, we recorded and resampled any previously banded bats present. We stored swabs in  
98 RNAlater until processing. We tested samples for *P. destructans* DNA using real-time PCR and  
99 quantified fungal loads [21, 38]. Animal handling protocols were approved by Virginia Tech  
100 IACUC (#17-180, #20-150).

101 We investigated the effect of bat early hibernation (November) body mass on the  
102 probability an individual was recaptured overwinter using a generalized linear mixed model  
103 (GLMM) with a binomial distribution and a probit link, with site as a random effect, and body  
104 mass and disease phase (epidemic = 1- 3 years since pathogen arrival, or established = 4-7 years  
105 since pathogen arrival) as interacting fixed effects. Phases were established based on previous  
106 results demonstrating that populations approach stability by year 4 following WNS arrival [6, 32]  
107 For analyses of individual survival and body mass, results were similar whether we used  
108 categorical disease phase or years since WNS as a continuous variable (Appendix) and grouping  
109 by phase maximized the number of bats in the epidemic years when mortality was high and the  
110 number of recaptured bats was low. For bats that were recaptured overwinter, we examined the  
111 effect of early winter body mass and infection on the amount of mass lost overwinter during both  
112 the epidemic and established phase using a linear mixed model with site as a random effect and  
113 the change in body mass as the response variable and fixed effects of early winter mass  
114 interacting early winter fungal loads with additional additive effect of disease phase. Finally, we  
115 explored changes in mass over time since the invasion of *P. destructans* on an individual and  
116 population level to examine both plasticity and phenotypic change. For bats that were recaptured  
117 in multiple years, we used a linear mixed model with mass as a response variable, years since  
118 WNS as a fixed effect, and bat band ID as a random effect to explore plasticity in whether  
119 individual bat mass changed over time. At a population level, declines in sites with the best  
120 invasion mass data limited our ability to explore changes in mass, so we restricted our analyses  
121 to N=5 sites that were measured during invasion and had sufficient bats to estimate during  
122 established periods using  $\log_{10}$  mass as our response variable (logged to normalize) and years  
123 since WNS interacting with season with site as a random effect.

124

## 125 **Results:**

126

127 As WNS invaded and caused massive declines in bat populations, bats that were heavier  
128 in early winter were more likely to be recaptured than lighter ones (Fig. 1; slope of mass  $\pm$  SE:  
129  $0.320 \pm 0.14$ ,  $P = 0.0220$ ). However, after WNS established in sites (years 4-7 following *P.*  
130 *destructans* detection), recapture overall was higher than during the epidemic (invasion vs  
131 establishment coef:  $3.551 \pm 1.46$ ,  $P = 0.0152$ ), and the effect of mass on the probability of

132 recapture was significantly lower than the epidemic phase (interaction slope:  $-0.357 \pm 0.16$ ,  $P =$   
133  $0.0250$ ), and the slope did not differ significantly from 0 (Appendix 1.0.3).

134 For bats that survived overwinter and were recaptured, mass lost overwinter depended on  
135 both early hibernation weight and infection, and their interaction (Fig. 2A;  $P = 0.00948$ ). There  
136 was little support for including disease phase as a predictor ( $P = 0.27$ ), likely due to the paucity  
137 of bats recaptured during the epidemic phase when mortality was high (Table S2). Generally,  
138 bats that were heavier lost more weight overwinter than bats that were lighter (coef:  $-0.737 \pm$   
139  $0.16$ ,  $t = -4.613$ ). In addition, as infection increased, so did the amount of mass lost (coef:  $1.002$   
140  $\pm 0.41$ ,  $t = 2.467$ ), but only for bats that were heavier in early winter; lighter bats lost less weight  
141 and weight loss did not vary with higher fungal loads (early mass:early loads coef:  $-0.106 \pm$   
142  $0.04$ ,  $t = -2.594$ , Appendix 2.0.2).

143 We found limited support for increases in mass at a population-level. Including years  
144 since pathogen arrival as a continuous effect, we found no clear support for increases in mass at a  
145 population-level (years since pathogen invasion coef:  $0.002 \pm 0.002$ ,  $t = 0.983$ , Fig. 2B, Table S3,  
146 Appendix 3.0.2). We did find support for a modest increase in  $\log_{10}$  early hibernation body mass  
147 between the epidemic and established periods at 5 sites that were sampled at all time points in  
148 most years (established coef:  $0.011 \pm 0.005$ ,  $t = 2.031$ , Fig. S1, Appendix 3.0.4), however this was  
149 largely due to an increase between one annual time step (Year 3 to Year 4). We found no support  
150 for an increase in mass due to plasticity (Appendix 4). Using just recaptured bats, we found weak  
151 and unclear support for increases in  $\log_{10}$  early hibernation body mass with years since WNS  
152 establishment ( $0.0037 \pm 0.003$ ,  $t = 1.508$ , Fig. S1 closed circles, Table S2, Appendix 4.0.2).  
153 Furthermore, masses of individual bats that were recaptured in multiple years decreased non-  
154 significantly ( $-0.0023 \pm 0.003$ ,  $t = -0.701$ , Fig. S2, Appendix 4.03). Among individual bats  
155 recaptured annually, there was high plasticity in body mass which ranged from  $-1.78 : +1.09$  g,  
156 suggesting that bat fat stores may be highly dependent on local conditions in summer and  
157 autumn.

158

159

160

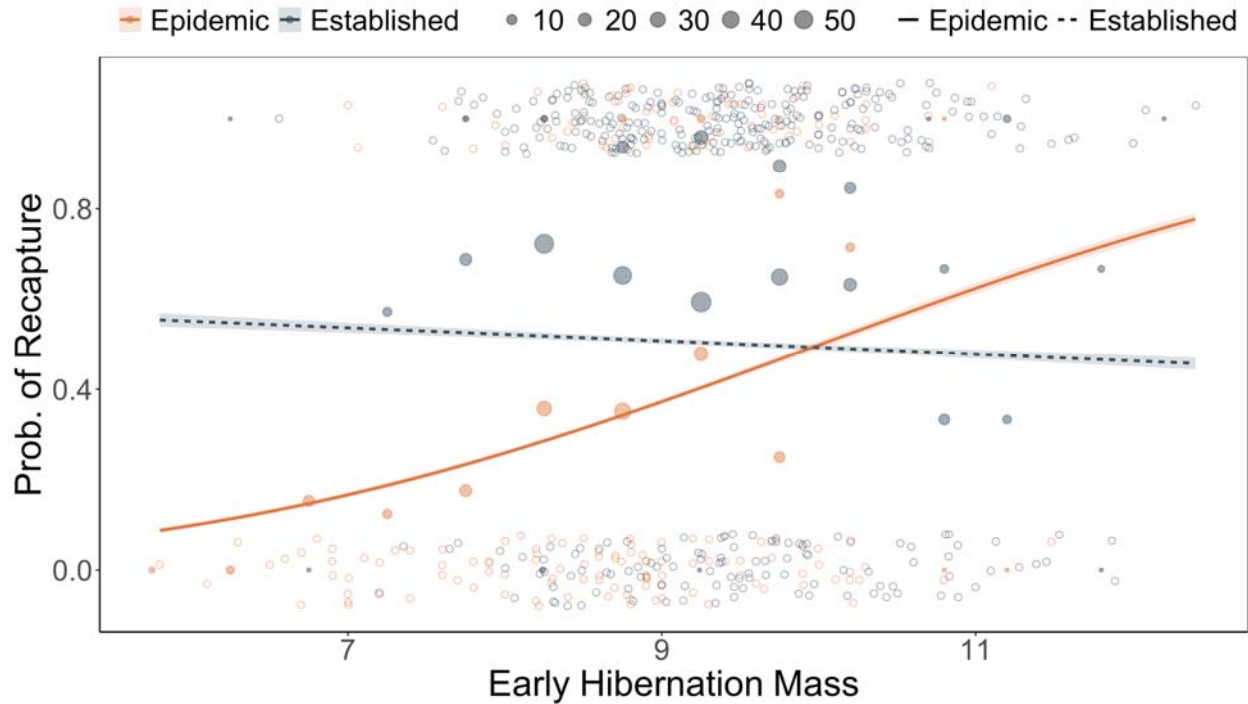

161

162 Figure 1. The effects of body mass during early hibernation on the probability of little brown bat  
163 recapture vary with time since *P. destructans* arrival. In years 0–3 post *P. destructans* arrival, the  
164 probability a bat was recaptured overwinter increased as early hibernation mass increased.  
165 However, after WNS established (>3 years since *P. destructans* arrival), there was no longer a  
166 clear trend between early hibernation body mass and bat survival. Solid points of early  
167 hibernation body masses during each phase show the fraction recaptured at 0.5 g bins (e.g. 9.75-  
168 10.25) and sample sizes for binned data.

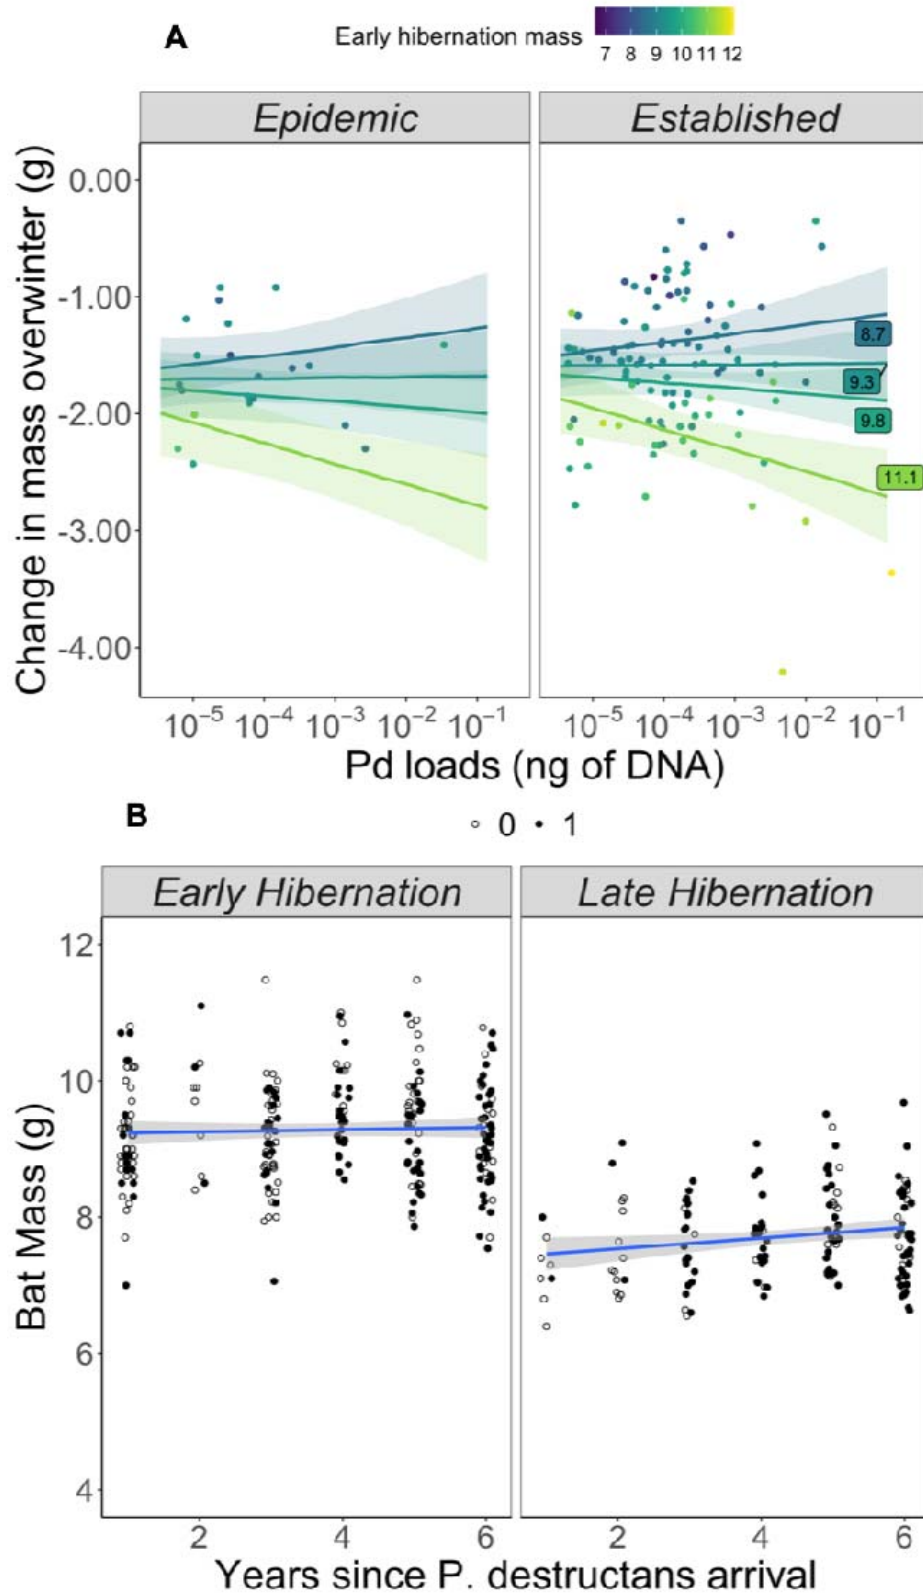

169

170 Figure 2. (A) Fungal loads and early hibernation (November) body mass of little brown bats

171 strongly influences the change in individual bat mass over winter. Points show individual bats



172 captured in both early and late hibernation. Colors denote masses of bats during early hibernation  
173 and labeled lines show predictions based on the 25th (8.7 g), 50th (9.3 g), 85th (9.8 g), and 95th  
174 (11.1 g) percentiles of the early hibernation masses. Bats that have higher initial body mass lose  
175 more weight over winter than bats with lower body mass (i.e. darker lines are higher), suggesting  
176 that bats budget fat stores accordingly over winter. In addition, fungal loads significantly modify  
177 the effect of early hibernation mass on mass lost overwinter. Bats with high infections that were  
178 heavier lose more mass than similarly infected bats that were lighter, suggesting that highly  
179 infected bats that survive to be recaptured budget fat in accordance with their infection status.  
180 **(B)** Average body mass of banded little brown bats in early (November) and late (March) that  
181 were recaptured (filled circles) or not recaptured (open circles) overwinter during the WNS  
182 epidemic (Years 0-3) and WNS established period (Years 4+) at the same sites over time (N=5).  
183 We found no clear support that hibernation body masses of bats increased over time when  
184 examining these data continuously (top) but marginal support categorically (Fig S1).

185

## 186 **Discussion**

187

188 We found that the effect of body mass on survival waned as the epidemic progressed.  
189 Furthermore, fat loss in bats increased with initial stored fat, as has been previously found in  
190 another species [39], suggesting that bats surviving with disease are budgeting fat stores to  
191 mitigate the physiological disruption posed by WNS. Importantly, we did not find evidence that  
192 bat survival once the disease established was enhanced by increases in the amount of stored fat  
193 [29]. We also found little support that fat increased at the population level as the disease  
194 established. When treating years since pathogen arrival continuously, there was no clear trend of  
195 increases in fat at the population-level. In some years, annual increases in fat occurred, but these  
196 were modest relative to the range of body conditions at the start of hibernation (recaptured bats  
197 during the established WNS period ranged from 7-12 grams and gains were an average of 0.18  
198 grams. We also found no support of consistent mass increases in individual bats, and year to year  
199 fat stores were highly variable (range -1.78: +1.09 grams).

200 There are several potential reasons that could explain why the importance of fat changed  
201 as *P. destructans* established. First, the initial epizootic may have selected for fatter individuals,  
202 thus making the effects of fat less apparent as the pathogen established. However, body mass

203 differences between the invasion and established phases were very modest relative to annual  
204 plasticity in bat masses, suggesting that this is unlikely. Second, bats in some populations have  
205 evolved higher pathogen resistance [33, 35] which may have reduced selection for increased  
206 body mass, particularly if fatter bats face other tradeoffs, such as reduced flight abilities [40, 41].  
207 Third, bats have shifted to using cooler microclimates that also reduce the growth of the fungus,  
208 resulting in less severe disease [34]. Fourth, changes in the pathogen (e.g. a reduction in  
209 virulence) could have enabled more hosts to survive, thus experiencing fewer adverse effects  
210 (e.g. excess fat loss) from the pathogen [42, 43]. Lastly, bats may have adapted to the  
211 physiological disruption posed by infection, as evidenced by the relationship between mass loss,  
212 infection, and early hibernation weight. This finding is consistent with the hibernation  
213 optimization hypothesis [44-46], suggesting that bats do not use a fixed amount of fat during  
214 hibernation [47, 48], and generally aligns with findings conducted on unaffected little brown bats  
215 that demonstrated increases in arousals with increases in early hibernation fat [44]. Overall,  
216 increased fat stores may have been beneficial initially, but changes in other host or pathogen  
217 traits may have relaxed selection on fat over time.

218 Our results have important implications for the conservation of bats impacted by WNS.  
219 Supplemental feeding and enhancement of autumn bat habitat to increase insect prey abundance  
220 have been explored as a management strategy to increase bat fat stores to reduce WNS impacts  
221 [49]. Our results strongly suggest that while this may have been effective prior to or during  
222 pathogen invasion, it provides little benefit to bats once the pathogen has been established for  
223 several years. We find that bats budget fat in accordance with their infection severity and initial  
224 fat stores, suggesting that supplemental feeding might not achieve the desired benefit of  
225 enhancing bat survival if bats simply alter fat use accordingly. In addition, supplemental feeding  
226 of wildlife may have unexpected negative consequences, including increases in predation,  
227 increases in susceptibility due to less nutritious food sources, and enhancement of pathogen  
228 spread due to host aggregation [50], and these potential negative effects should be carefully  
229 considered before widescale implementation.

230 Species survival in the face of global change will likely require rapid adaptation and  
231 change itself may outpace the speed at which species can evolve [51, 52]. For species and  
232 populations that persist, some traits that may be beneficial for initial survival may prove less  
233 important over time [9, 53]. This phenomenon may be partly explained by coevolutionary theory

234 which suggests that both hosts and pathogen must constantly adapt and innovate in order to  
235 maintain high fitness [12]. Ultimately, developing a more comprehensive understanding of the  
236 pre-adaptive factors that aid in population health can enable us to build more resilient  
237 populations in the Anthropocene.

238

### 239 **Acknowledgements**

240 We thank Steffany Yamada for data curation support, Rick Reynolds for logistical support, and  
241 the many landowners for site access.

242

### 243 **Funding**

244 The research was funded by NSF grant DEB-1911853 to KEL, JRH, AMK & JTF, the USFWS  
245 (F17AP00591) to KEL.

246

### 247 **Data Availability Statement**

248 The datasets and code generated in this study have been included in the electronic supplementary  
249 material for review and will be deposited in Dryad Digital Repository upon final submission.

250 Exact site locations are not disclosed to protect endangered species and landowners.

251

### 252 **Ethics Statement**

253 Animal handling protocols were approved by Virginia Tech IACUC (#17-180, #20-150). Field  
254 work was conducted under approved permits from the Wisconsin Department of Natural  
255 Resources, the Virginia Division of Game and Inland Fisheries, the Illinois Department of  
256 Natural Resources, and the Michigan Department of Natural Resources. All personnel followed  
257 field hygiene protocols for *P. destructans* as recommended by the USFWS.

258

### 259 **Conflict of Interest**

260 We declare no competing interests.

261

### 262 **Author Contributions**

263 K.E.L.: conceptualization, investigation, methodology, funding acquisition, resources, project  
264 administration, data curation, formal analysis, writing-original draft, writing-review and editing;

265 M.J.K.: investigation, methodology, writing-review and editing,

266 N.A.L.: investigation, methodology, writing-review and editing,  
267 J.P.W.: investigation, writing-review and editing,  
268 H.M.K.: investigation, writing-review and editing,  
269 J.A.R.: investigation, writing-review and editing,  
270 J.E.D.: investigation, resources  
271 K.L.P.: investigation, writing-review and editing,  
272 J.T.F.: investigation, funding acquisition, writing-review and editing,  
273 A.M.K.: investigation, funding acquisition, writing-review and editing,  
274 J.R.H.: conceptualization, investigation, methodology, funding acquisition, resources, project  
275 administration, data curation, writing-review and editing  
276

277

## 278 **References**

- 279 [1] Fisher, M.C., Henk, D.A., Briggs, C.J., Brownstein, J.S., Madoff, L.C., McCraw, S.L. &  
280 Gurr, S.J. 2012 Emerging fungal threats to animal, plant and ecosystem health. *Nature* **484**, 186-  
281 194. (doi:10.1038/nature10947).
- 282 [2] Lips, K.R., Brem, F., Brenes, R., Reeve, J.D., Alford, R.A., Voyles, J., Carey, C., Livo, L.,  
283 Pessier, A.P. & Collins, J.P. 2006 Emerging infectious disease and the loss of biodiversity in a  
284 Neotropical amphibian community. *Proceedings of the National Academy of Sciences of the*  
285 *United States of America* **103**, 3165-3170. (doi:10.1073/pnas.0506889103).
- 286 [3] Daszak, P. & Cunningham, A.A. 1999 Extinction by infection. *Trends in Ecology &*  
287 *Evolution* **14**, 279-279.
- 288 [4] Aguirre, A.A. & Tabor, G.M. 2008 Global Factors Driving Emerging Infectious Diseases  
289 Impact on Wildlife Populations. In *Animal Biodiversity and Emerging Diseases: Prediction and*  
290 *Prevention* (eds. O.A.E. Sparagano, J.C. Maillard & J.V. Figueroa), pp. 1-3. Oxford, Blackwell  
291 Publishing.
- 292 [5] Smith, K.F., Acevedo-Whitehouse, K. & Pedersen, A.B. 2009 The role of infectious diseases  
293 in biological conservation. *Anim. Conserv.* **12**, 1-12. (doi:10.1111/j.1469-1795.2008.00228.x).
- 294 [6] Langwig, K.E., Frick, W.F., Bried, J.T., Hicks, A.C., Kunz, T.H. & Marm Kilpatrick, A.  
295 2012 Sociality, density-dependence and microclimates determine the persistence of populations  
296 suffering from a novel fungal disease, white-nose syndrome. *Ecology Letters* **15**, 1050-1057.  
297 (doi:10.1111/j.1461-0248.2012.01829.x).
- 298 [7] Skerratt, L.F., Berger, L., Speare, R., Cashins, S., McDonald, K.R., Phillott, A.D., Hines,  
299 H.B. & Kenyon, N. 2007 Spread of chytridiomycosis has caused the rapid global decline and  
300 extinction of frogs. *EcoHealth* **4**, 125-134.
- 301 [8] Råberg, L., Sim, D. & Read, A.F. 2007 Disentangling genetic variation for resistance and  
302 tolerance to infectious diseases in animals. *Science* **318**, 812-814.
- 303 [9] Svensson, E.I. & Råberg, L. 2010 Resistance and tolerance in animal enemy–victim  
304 coevolution. *Trends in ecology & evolution* **25**, 267-274.
- 305 [10] Gomulkiewicz, R. & Holt, R.D. 1995 When does evolution by natural-selection prevent  
306 extinction. *Evolution* **49**, 201-207. (doi:10.2307/2410305).
- 307 [11] Colautti, R.I., Alexander, J.M., Dlugosch, K.M., Keller, S.R. & Sultan, S.E. 2017 Invasions  
308 and extinctions through the looking glass of evolutionary ecology. *Philosophical Transactions of*  
309 *the Royal Society B: Biological Sciences* **372**, 20160031.

- 310 [12] Thompson, J.N. 2005 Coevolution: the geographic mosaic of coevolutionary arms races.  
311 *Current Biology* **15**, R992-R994.
- 312 [13] Thompson, J.N. 2013 *Relentless evolution*, University of Chicago Press.
- 313 [14] Strauss, S.Y., Lau, J.A. & Carroll, S.P. 2006 Evolutionary responses of natives to  
314 introduced species: what do introductions tell us about natural communities? *Ecology letters* **9**,  
315 357-374.
- 316 [15] Smith, V.H., Jones, T.P. & Smith, M.S. 2005 Host nutrition and infectious disease: an  
317 ecological view. *Frontiers in Ecology and the Environment* **3**, 268-274.
- 318 [16] Sanchez, C.A., Becker, D.J., Teitelbaum, C.S., Barriga, P., Brown, L.M., Majewska, A.A.,  
319 Hall, R.J. & Altizer, S. 2018 On the relationship between body condition and parasite infection  
320 in wildlife: a review and meta-analysis. *Ecology letters* **21**, 1869-1884.
- 321 [17] Hoyt, J.R., Kilpatrick, A.M. & Langwig, K.E. 2021 Ecology and impacts of white-nose  
322 syndrome on bats. *Nature Reviews Microbiology*. (doi:10.1038/s41579-020-00493-5).
- 323 [18] Langwig, K.E., Frick, W.F., Reynolds, R., Parise, K.L., Drees, K.P., Hoyt, J.R., Cheng,  
324 T.L., Kunz, T.H., Foster, J.T. & Kilpatrick, A.M. 2015 Host and pathogen ecology drive the  
325 seasonal dynamics of a fungal disease, white-nose syndrome. *Proceedings of the Royal Society*  
326 *B: Biological Sciences* **282**. (doi:10.1098/rspb.2014.2335).
- 327 [19] Warnecke, L., Turner, J.M., Bollinger, T.K., Lorch, J.M., Misra, V., Cryan, P.M., Wibbelt,  
328 G., Blehert, D.S. & Willis, C.K.R. 2012 Inoculation of bats with European *Geomyces*  
329 *destructans* supports the novel pathogen hypothesis for the origin of white-nose syndrome.  
330 *Proceedings of the National Academy of Sciences of the United States of America* **109**, 6999-  
331 7003. (doi:10.1073/pnas.1200374109).
- 332 [20] Lorch, J.M., Meteyer, C.U., Behr, M.J., Boyles, J.G., Cryan, P.M., Hicks, A.C., Ballmann,  
333 A.E., Coleman, J.T.H., Redell, D.N., Reeder, D.M., et al. 2011 Experimental infection of bats  
334 with *Geomyces destructans* causes white-nose syndrome. *Nature* **480**, 376-378.  
335 (doi:[http://www.nature.com/nature/journal/vaop/ncurrent/abs/nature10590.html#supplementary-](http://www.nature.com/nature/journal/vaop/ncurrent/abs/nature10590.html#supplementary-information)  
336 [information](http://www.nature.com/nature/journal/vaop/ncurrent/abs/nature10590.html#supplementary-information)).
- 337 [21] Langwig, K.E., Frick, W.F., Hoyt, J.R., Parise, K.L., Drees, K.P., Kunz, T.H., Foster, J.T. &  
338 Kilpatrick, A.M. 2016 Drivers of variation in species impacts for a multi-host fungal disease of  
339 bats. *Phil. Trans. R. Soc. B* **371**, 20150456.
- 340 [22] Langwig, K.E., Hoyt, J.R., Parise, K.L., Kath, J., Kirk, D., Frick, W.F., Foster, J.T. &  
341 Kilpatrick, A.M. 2015 Invasion dynamics of white-nose syndrome white-nose syndrome fungus,  
342 midwestern United States, 2012-2014. *Emerg Infect Dis* **21**.  
343 (doi:<http://dx.doi.org/10.3201/eid2106.150123>).
- 344 [23] Verant, M.L., Boyles, J.G., Waldrep, W., Wibbelt, G. & Blehert, D.S. 2012 Temperature-  
345 dependent growth of *Geomyces destructans*, the fungus that causes bat white-nose syndrome.  
346 *PLoS One* **7**. (doi:e46280 10.1371/journal.pone.0046280).
- 347 [24] Verant, M.L., Carol, M.U., Speakman, J.R., Cryan, P.M., Lorch, J.M. & Blehert, D.S. 2014  
348 White-nose syndrome initiates a cascade of physiologic disturbances in the hibernating bat host.  
349 *BMC physiology* **14**, 10.
- 350 [25] Warnecke, L., Turner, J.M., Bollinger, T.K., Misra, V., Cryan, P.M., Blehert, D.S., Wibbelt,  
351 G. & Willis, C.K.R. 2013 Pathophysiology of white-nose syndrome in bats: a mechanistic model  
352 linking wing damage to mortality. *Biology Letters* **9**. (doi:10.1098/rsbl.2013.0177).
- 353 [26] Wilcox, A., Warnecke, L., Turner, J.M., McGuire, L.P., Jameson, J.W., Misra, V.,  
354 Bollinger, T.C. & Willis, C.K.R. 2014 Behaviour of hibernating little brown bats experimentally

- 355 inoculated with the pathogen that causes white-nose syndrome. *Animal Behaviour* **88**, 157-164.  
356 (doi:<http://dx.doi.org/10.1016/j.anbehav.2013.11.026>).
- 357 [27] Cryan, P., Meteyer, C., Boyles, J. & Blehert, D. 2010 Wing pathology of white-nose  
358 syndrome in bats suggests life-threatening disruption of physiology. *BMC Biology* **8**, 135.
- 359 [28] Willis, C.K.R., Menzies, A.K., Boyles, J.G. & Wojciechowski, M.S. 2011 Evaporative  
360 water loss is a plausible explanation for mortality of bats from white-nose syndrome. *Integr.*  
361 *Comp. Biol.* **51**, 364-373. (doi:10.1093/icb/icr076).
- 362 [29] Cheng, T.L., Gerson, A., Moore, M.S., Reichard, J.D., DeSimone, J., Willis, C.K., Frick,  
363 W.F. & Kilpatrick, A.M. 2019 Higher fat stores contribute to persistence of little brown bat  
364 populations with white-nose syndrome. *Journal of Animal Ecology* **88**, 591-600.
- 365 [30] Lilley, T.M., Johnson, J.S., Ruokolainen, L., Rogers, E.J., Wilson, C.A., Schell, S.M., Field,  
366 K.A. & Reeder, D.M. 2016 White-nose syndrome survivors do not exhibit frequent arousals  
367 associated with *Pseudogymnoascus destructans* infection. *Front. Zool.* **13**, 1-8.
- 368 [31] Gignoux-Wolfsohn, S.A., Pinsky, M.L., Kerwin, K., Herzog, C., Hall, M., Bennett, A.B.,  
369 Fefferman, N.H. & Maslo, B. 2021 Genomic signatures of selection in bats surviving white-nose  
370 syndrome. *Molecular Ecology* **30**, 5643-5657. (doi:<https://doi.org/10.1111/mec.15813>).
- 371 [32] Hoyt, J.R., Langwig, K.E., Sun, K., Parise, K.L., Li, A., Wang, Y., Huang, X., Worledge,  
372 L., Miller, H., White, J.P., et al. 2020 Environmental reservoir dynamics predict global infection  
373 patterns and population impacts for the fungal disease white-nose syndrome. *Proceedings of the*  
374 *National Academy of Sciences* **117**, 7255. (doi:10.1073/pnas.1914794117).
- 375 [33] Langwig, K.E., Hoyt, J.R., Parise, K.L., Frick, W.F., Foster, J.T. & Kilpatrick, A.M. 2017  
376 Resistance in persisting bat populations after white-nose syndrome invasion. *Phil. Trans. Roy.*  
377 *Soc. B* **10.1098/rstb.2016.0044**.
- 378 [34] Hopkins, S.R., Hoyt, J.R., White, J.P., Kaarakka, H.M., Redell, J.A., DePue, J.E., Scullon,  
379 W.H., Kilpatrick, A.M. & Langwig, K.E. 2021 Continued preference for suboptimal habitat  
380 reduces bat survival with white-nose syndrome. *Nat. Commun.* **12**, 1-9.
- 381 [35] Grimaudo, A.T., Hoyt, J.R., Yamada, S.A., Herzog, C.J., Bennett, A.B. & Langwig, K.E.  
382 2022 Host traits and environment interact to determine persistence of bat populations impacted  
383 by white-nose syndrome. *Ecology Letters* **25**, 483-497.
- 384 [36] Frick, W.F., Reynolds, D.S. & Kunz, T.H. 2010 Influence of climate and reproductive  
385 timing on demography of little brown myotis *Myotis lucifugus*. *Journal of Animal Ecology* **79**,  
386 128-136. (doi:10.1111/j.1365-2656.2009.01615.x).
- 387 [37] McGuire, L.P., Kelly, L.A., Baloun, D.E., Boyle, W.A., Cheng, T.L., Clerc, J., Fuller, N.W.,  
388 Gerson, A.R., Jonasson, K.A. & Rogers, E.J. 2018 Common condition indices are no more  
389 effective than body mass for estimating fat stores in insectivorous bats. *Journal of Mammalogy*  
390 **99**, 1065-1071.
- 391 [38] Muller, L.K., Lorch, J.M., Lindner, D.L., O'Connor, M., Gargas, A. & Blehert, D.S. 2013  
392 Bat white-nose syndrome: a real-time TaqMan polymerase chain reaction test targeting the  
393 intergenic spacer region of *Geomyces destructans*. *Mycologia* **105**, 253-259. (doi:10.3852/12-  
394 242).
- 395 [39] McGuire, L.P., Johnson, E.M., Frick, W.F. & Boyles, J.G. 2021 Temperature alone is  
396 insufficient to understand hibernation energetics. *Journal of Experimental Biology* **224**,  
397 jeb239772.
- 398 [40] Norberg, U.M.L. & Norberg, R.Å. 2012 Scaling of wingbeat frequency with body mass in  
399 bats and limits to maximum bat size. *Journal of Experimental Biology* **215**, 711-722.

- 400 [41] Gunnell, G.F. & Simmons, N.B. 2012 *Evolutionary history of bats: fossils, molecules and*  
401 *morphology*, Cambridge University Press.
- 402 [42] Fenner, F. & Woodroffe, G.M. 1965 Changes in the virulence and antigenic structure of  
403 strains of myxoma virus recovered from Australian wild rabbits between 1950 and 1964.  
404 *Australian Journal of Experimental Biology and Medical Science* **43**, 359-370.
- 405 [43] Fleming-Davies, A.E., Williams, P.D., Dhondt, A.A., Dobson, A.P., Hochachka, W.M.,  
406 Leon, A.E., Ley, D.H., Osnas, E.E. & Hawley, D.M. 2018 Incomplete host immunity favors the  
407 evolution of virulence in an emergent pathogen. *Science* **359**, 1030-1033.
- 408 [44] Czenze, Z.J., Jonasson, K.A. & Willis, C.K. 2017 Thrifty females, frisky males: winter  
409 energetics of hibernating bats from a cold climate. *Physiological and Biochemical Zoology* **90**,  
410 502-511.
- 411 [45] Jonasson, K.A. & Willis, C.K.R. 2011 Changes in Body Condition of Hibernating Bats  
412 Support the Thrifty Female Hypothesis and Predict Consequences for Populations with White-  
413 Nose Syndrome. *PLoS One* **6**. (doi:e21061 10.1371/journal.pone.0021061).
- 414 [46] Humphries, M.M., Thomas, D.W. & Kramer, D.L. 2003 The role of energy availability in  
415 mammalian hibernation: a cost-benefit approach. *Physiological and Biochemical Zoology* **76**,  
416 165-179.
- 417 [47] Thomas, D. 1995 The physiological ecology of hibernation in vespertilionid bats. *Symp Zool*  
418 *Soc Lond* **67**, 233 - 244.
- 419 [48] Thomas, D., Dorais, M. & Bergeron, J. 1990 Winter energy budgets and cost of arousals for  
420 hibernating little brown bats, *Myotis lucifugus*. *J Mammal* **71**, 475 - 479.
- 421 [49] Federation, N.F.a.W. 2021 NFWF Announces \$770,000 in Grants to Help Bats in their  
422 Fight Against White-nose Syndrome. ([https://www.nfwf.org/media-center/press-releases/nfwf-](https://www.nfwf.org/media-center/press-releases/nfwf-announces-770000-grants-help-bats-their-fight-against-white-nose-syndrome)  
423 [announces-770000-grants-help-bats-their-fight-against-white-nose-syndrome](https://www.nfwf.org/media-center/press-releases/nfwf-announces-770000-grants-help-bats-their-fight-against-white-nose-syndrome)).
- 424 [50] Murray, M.H., Becker, D.J., Hall, R.J. & Hernandez, S.M. 2016 Wildlife health and  
425 supplemental feeding: a review and management recommendations. *Biological Conservation*  
426 **204**, 163-174.
- 427 [51] Carroll, S.P., Jørgensen, P.S., Kinnison, M.T., Bergstrom, C.T., Denison, R.F., Gluckman,  
428 P., Smith, T.B., Strauss, S.Y. & Tabashnik, B.E. 2014 Applying evolutionary biology to address  
429 global challenges. *Science* **346**, 1245993.
- 430 [52] Forester, B.R., Beever, E.A., Darst, C., Szymanski, J. & Funk, W.C. 2022 Linking  
431 evolutionary potential to extinction risk: applications and future directions. *Frontiers in Ecology*  
432 *and the Environment* **20**, 507-515.
- 433 [53] Boots, M., Best, A., Miller, M.R. & White, A. 2009 The role of ecological feedbacks in the  
434 evolution of host defence: what does theory tell us? *Philos. Trans. R. Soc. B-Biol. Sci.* **364**, 27-  
435 36. (doi:10.1098/rstb.2008.0160).
- 436
